# Supplementary material for: Impact of Disseminated Neuroblastoma Cells on the Identification of the Relapse-Seeding Clone
Source: Oxford University Press journal article supplement (doi:10.1158/1078-0432.ccr-16-2082), 2017-02-22
Supplement: 10780432ccr162082-sup-170399_3_supp_3859411_pl26cb.xlsx [file 10780432ccr162082-sup-170399_3_supp_3859411_pl26cb.xlsx]

## Sheet: Supplementary Table S2
Supplementary Table S2. Samples' information and clinical information of stage 4 neuroblastoma patients included in the cohort
Patients' No.	Age at Dx (M)	OS (M)	OS Status	EFS (M)	EFS Status	Gender	Samples' type	terminal 1p del.	1q gain	terminal 1q del.	MNA	2p gain	terminal 3p del.	4p loss	6q loss	7q gain	11q del.	17q gain	terminal 19q loss	ATRX del.
1	61.4	22.2	1	17.1	1	M	DTCs at relapse	1	1	0	0	1	1	0	1	1	1	1	1	0
2	29.2	14.6	1	12.8	1	M	DTCs at diagnosis	0	0	0	1	0	0	0	0	0	cnLOH	0	0	0
							Primary tumor after chemo	0	0	0	1	0	0	0	0	0	cnLOH	1	0	0
							DTCs at relapse	0	0	0	1	0	0	0	0	1	cnLOH	1	1	0
3	89.7	50.7	1	28.7	1	F	DTCs at relapse	0	0	1	0	1	0	0	0	1	1	1	0	1
4	69.9	20.6	1	16.3	1	M	DTCs at diagnosis	1	1	0	1	0	0	0	0	0	1	1	0	0
							DTCs at relapse	1	1	0	1	0	0	0	0	0	1	1	0	0
5	N/A	N/A	N/A	N/A	N/A	F	DTCs (unknown time)	1	1	0	1	0	0	0	0	0	0	0	0	0
6	92.7	58.7	1	56.7	1	M	DTCs at relapse	1	0	0	0	1	1	0	0	0	1	1	1	0
7	51.2	30.3	1	25.8	1	M	DTCs at diagnosis	0	0	1	0	0	0	0	0	1	1	1	0	0
8	41.3	0.4	1	0.4	1	F	DTCs at diagnosis	1	0	0	1	0	0	0	1	0	0	1	0	0
9	51.5	26.8	1	22.1	1	F	DTCs at diagnosis	0	0	1	0	0	0	0	0	1	1	1	1	1
							Primary tumor after chemo	0	0	0	0	0	0	0	0	1	1	1	0	1
							DTCs at relapse	0	0	0	0	0	0	0	0	1	1	1	1	1
10	19.3	68.6	0	68.6	0	M	DTCs at diagnosis	1	0	0	1	1	0	0	0	0	0	1	0	0
							Primary tumor at diagnosis	1	0	0	1	1	0	0	0	0	0	1	0	0
11	2.5	54.9	1	49.8	1	F	Primary tumor at diagnosis	1	0	0	1	0	0	0	0	0	0	0	0	0
							DTCs during therapy	1	0	0	1	0	0	0	0	0	0	0	0	0
12	34	57.8	0	57.8	0	M	DTCs at diagnosis	0	1	0	1	0	0	0	0	0	cnLOH	1	0	0
							Primary tumor at diagnosis	0	1	0	1	0	0	0	0	0	cnLOH	1	0	0
13	28	23.3	1	16.4	1	F	DTCs at diagnosis	1	0	0	1	0	0	0	1	0	0	1	0	0
14	N/A	N/A	N/A	N/A	N/A	F	DTCs (unknown time)	1	0	0	0	1	0	0	0	1	0	1	0	0
15	3	224.2	0	224.2	0	F	DTCs at diagnosis	1	0	0	1	0	0	0	0	0	0	1	0	0
							Primary tumor at diagnosis	1	0	0	1	0	0	0	0	0	0	1	0	0
16	73.7	1.1	1	1.1	1	M	DTCs at diagnosis	1	0	0	0	1	1	0	0	1	1	1	0	1
17	104.4	47.3	1	37.8	1	M	DTCs at diagnosis	1	1	0	0	0	1	0	0	0	1	1	0	0
							DTCs at relapse	1	1	0	0	0	1	0	1	1	1	1	0	0
18	38	5.1	1	5.1	1	M	DTCs at diagnosis	0	1	0	1	0	0	1	0	0	1	1	0	0
19	39.2	4.9	1	4.9	1	F	DTCs at diagnosis	0	0	0	0	0	0	0	1	0	1	1	0	0
20	129	51.8	1	30	1	M	DTCs at diagnosis	0	0	1	0	0	0	0	0	0	0	1	0	1
							Primary tumor after chemo	0	0	0	0	0	0	0	0	0	0	1	0	1
21	13.5	11.5	1	10.2	1	M	DTCs at diagnosis	1	0	0	1	0	0	0	0	0	0	1	0	0
22	35.3	21	1	17.6	1	F	DTCs at diagnosis	0	1	0	0	1	1	0	0	0	1	1	0	0
							Primary tumor after chemo	0	1	0	0	1	1	0	0	0	1	1	0	0
23	48.3	20.2	1	15.6	1	M	DTCs at diagnosis	1	1	0	0	1	0	0	0	1	cnLOH	1	0	0
24	93.6	24.5	1	18.7	1	F	DTCs at diagnosis	1	0	1	0	0	0	0	1	1	1	1	1	0
							Primary tumor after chemo	1	0	1	0	0	0	0	0	1	1	1	0	0
							DTCs at relapse	1	1	1	Het or gain	0	0	0	1	1	1	1	0	0
25	58.5	165.7	1	27.2	1	F	DTCs at relapse	1	0	0	0	0	1	0	0	1	1	1	0	0
26	6.6	28.2	1	14.8	1	F	Primary tumor after chemo	1	0	0	1	0	0	0	0	0	0	1	0	0
							DTCs at relapse	1	0	0	1	0	0	0	0	0	0	1	0	0
27	N/A	N/A	N/A	N/A	N/A	F	DTCs (unknown time)	1	0	0	0	0	1	0	0	1	1	1	0	0
28	26.3	16.2	1	14.1	1	F	DTCs at relapse	1	1	0	0	1	0	0	0	0	1	1	0	0
29	N/A	N/A	N/A	N/A	N/A	M	DTCs (unknown time)	0	0	0	0	1	0	0	0	0	0	1	0	0
30	36.2	28	1	14.1	1	F	DTCs at relapse	1	0	0	1	0	0	0	0	0	0	1	0	0
31	28.5	22.7	1	17	1	F	Primary tumor at diagnosis	1	0	0	1	0	0	0	0	0	0	1	0	0
							DTCs at relapse	1	0	0	1	1	0	0	0	1	1	1	0	0
32	49	34.9	0	26.3	1	M	DTCs at relapse	1	0	0	0	1	0	0	0	0	1	1	0	0
33	8.6	6.8	1	6.8	1	M	DTCs at diagnosis	1	0	0	1	0	0	0	0	0	0	1	0	0
34	26.9	14.8	0	14.8	0	F	DTCs at diagnosis	0	0	0	0	0	1	0	0	0	1	1	0	0
							Primary tumor after chemo	0	0	0	0	0	0	0	0	1	1	1	0	0
35	47.8	178.5	0	178.5	0	F	DTCs at diagnosis	1	0	0	1	0	0	0	0	0	0	1	0	0
							Primary tumor at diagnosis	1	0	0	1	0	0	0	0	0	0	1	0	0
36	N/A	N/A	N/A	N/A	N/A	M	DTCs (unknown time)	1	1	0	1	0	0	0	0	0	0	1	0	0
37	36	122.7	0	122.7	0	F	DTCs at diagnosis	1	1	1	0	1	1	1	0	1	1	1	1	0
38	71.2	61.8	1	53.8	1	M	Primary tumor after chemo	1	1	0	0	0	1	0	1	0	0	1	0	0
							DTCs at relapse	1	1	0	0	0	1	0	1	0	0	1	0	0
39	69.3	39.8	1	30.4	1	F	DTCs at diagnosis	0	0	1	Het	0	1	0	0	1	1	1	0	0
							Primary tumor after chemo	0	0	1	Het	0	1	0	0	1	1	1	0	0
40	11.5	107	1	73	1	F	Primary tumor at diagnosis	1	0	0	0	0	0	0	0	0	0	1	0	0
							DTCs at 1st relapse	1	1	0	0	0	0	0	1	0	1	1	0	0
							DTCs at 2nd relapse	1	1	0	0	0	0	0	1	0	1	0	0	0
41	42	139.8	0	139.8	0	M	DTCs at diagnosis	0	0	1	0	1	0	0	0	0	1	1	0	0
42	27.2	27.9	1	24.6	1	M	DTCs at diagnosis	1	0	0	1	0	0	0	1	0	0	1	0	0
43	45.3	31.6	1	26.4	1	F	DTCs at relapse	1	0	0	0	1	0	0	1	0	1	1	0	1
44	57.4	42.1	1	22.9	1	M	DTCs at diagnosis	0	0	0	0	0	0	0	1	0	0	1	0	0
							Primary tumor after chemo	0	0	0	Het	0	0	0	0	0	0	1	0	0
45	8.5	4.9	1	4.9	1	M	DTCs at diagnosis	1	0	0	1	0	0	0	1	0	0	1	0	0
46	59.9	29.5	1	27.3	1	M	Primary tumor after chemo	0	1	0	0	0	1	1	0	1	1	1	0	0
							DTCs at relapse	0	1	0	Het or gain	0	1	1	0	1	1	1	0	0
47	33.4	116	0	116	0	M	DTCs at diagnosis	0	0	0	0	0	0	0	0	0	1	1	0	1
48	13.2	20.9	1	19.4	1	M	DTCs at diagnosis	1	1	0	1	0	0	0	1	0	0	1	0	0
							Primary tumor after chemo	1	1	0	1	0	0	0	1	0	0	1	0	0
49	32.6	9.7	1	8.3	1	M	Primary tumor after chemo	1	0	0	1	0	0	0	0	0	0	1	0	0
							DTCs at relapse	1	0	0	1	1	0	0	0	0	0	1	0	0
50	23.9	81.7	1	48.8	1	F	Primary tumor at diagnosis	1	0	0	1	0	0	0	0	0	0	1	0	0
							DTCs at relapse	1	0	0	1	0	0	0	0	0	0	1	0	0
51	42.3	21.8	1	19.6	1	M	DTCs at diagnosis	1	0	0	1	0	0	0	0	0	0	1	0	0
							Primary tumor at diagnosis	1	0	0	1	0	0	0	0	0	0	1	0	0
52	62.3	115.6	0	115.6	0	F	DTCs at diagnosis	0	0	0	0	1	1	0	1	1	0	1	0	0
53	13.7	33.5	1	31.6	1	F	DTCs at diagnosis	1	0	0	1	0	0	0	0	0	0	1	0	0
							Primary tumor after chemo	1	0	0	1	0	0	0	0	0	0	1	0	0
54	9	84.1	0	84.1	0	M	DTCs at diagnosis	1	0	0	0	1	0	0	0	0	0	1	0	0
55	7.5	119	0	119	0	M	DTCs at diagnosis	0	0	0	0	0	0	1	0	1	1	1	0	0
							Primary tumor at diagnosis	0	0	0	0	0	0	1	0	1	1	1	0	0
56	12.2	120.2	0	120.2	0	M	DTCs at diagnosis	1	0	0	1	0	0	0	0	0	0	1	0	0
							Primary tumor after chemo	1	0	0	1	1	0	0	0	0	1	1	0	0
57	51.3	116.1	0	16.9	1	M	DTCs at diagnosis	0	1	1	0	0	0	0	0	1	1	1	1	1
58	27.6	18.1	1	17.5	1	F	DTCs at diagnosis	0	1	0	0	0	0	0	0	0	0	0	0	0
							Primary tumor at diagnosis	0	1	0	0	0	0	0	0	0	0	0	0	0
59	26.2	82.9	1	46.9	1	M	Primary tumor after chemo	1	0	0	0	1	1	1	0	0	0	1	0	0
							DTCs at relapse	1	0	0	0	1	1	1	0	1	1	1	0	0
60	71.7	77.7	1	36.2	1	M	DTCs at relapse	0	0	1	0	0	1	1	0	1	1	1	0	1
61	56	17.5	1	15.4	1	F	DTCs at diagnosis	1	0	0	0	1	1	0	0	0	1	1	0	0
62	30.4	13.9	1	10.1	1	M	DTCs at diagnosis	0	0	0	0	1	0	1	0	1	1	1	1	0
							Primary tumor after chemo	0	1	0	0	1	0	1	0	1	1	1	1	0
63	39.8	51.4	1	19.3	1	M	DTCs at diagnosis	0	1	0	0	1	1	1	0	0	1	1	0	0
							Primary tumor after chemo	0	1	0	0	1	1	1	0	0	1	1	0	0
64	32.8	45	1	14.9	1	M	Primary tumor after chemo	0	0	0	0	0	1	1	0	1	1	1	1	0
							DTCs at relapse	0	0	1	0	0	1	1	1	1	1	1	1	0
65	55.2	86.4	1	51.1	1	M	DTCs at diagnosis	1	0	1	1	0	0	0	1	0	0	0	0	0
							DTCs at 1st relapse	1	0	1	1	0	0	0	1	0	0	0	1	0
							DTCs at 2nd relapse	1	1	1	1	0	0	0	1	0	0	0	1	0
66	145.1	43.3	1	35.7	1	F	Primary tumor at diagnosis	0	0	0	0	0	0	0	0	0	cnLOH	1	0	0
							DTCs at 1st relapse	0	1	0	0	0	0	0	0	0	cnLOH	1	0	0
							DTCs at 2nd relapse	0	1	1	0	0	0	0	0	0	cnLOH	1	0	0
67	24.7	60.4	1	23.9	1	M	DTCs at diagnosis	1	1	0	1	1	0	0	0	0	0	1	0	0
68	56.3	91.5	0	91.5	0	M	DTCs at diagnosis	0	0	0	0	1	1	0	0	0	1	1	0	0
69	17.4	9.8	1	9.8	1	M	DTCs at diagnosis	1	1	0	0	1	0	1	0	0	1	1	1	0
70	127.1	78.2	0	78.2	0	M	DTCs at diagnosis	1	1	0	0	0	0	0	0	0	0	0	0	0
							Primary tumor after chemo	1	1	0	0	0	0	0	0	0	0	0	0	0
71	16.1	5.3	1	5.3	1	M	DTCs at diagnosis	1	0	0	0	1	1	1	0	1	1	1	0	0
72	80.3	24.1	1	24.1	1	F	DTCs at diagnosis	0	0	0	0	0	1	1	0	1	1	1	0	0
73	94.7	37.1	1	31.1	1	M	Primary tumor at diagnosis	1	0	0	Het	0	0	0	0	1	1	1	0	0
							DTCs at relapse	0	0	0	0	1	0	0	1	1	1	1	0	0
74	50.1	45.3	1	7.7	1	M	Primary tumor after chemo	0	0	0	0	0	1	1	0	0	1	1	0	0
							DTCs at relapse	0	0	0	0	0	1	1	0	0	1	1	0	0
75	38	48.3	0	48.3	0	M	DTCs at diagnosis	1	0	0	0	1	0	1	0	0	0	1	0	0
							Primary tumor after chemo	1	0	0	0	1	0	1	0	0	0	1	0	0
76	130.7	30	0	20.3	1	F	DTCs at relapse	0	1	1	0	0	0	0	0	0	1	0	0	0
77	73.6	35	0	35	0	F	DTCs at diagnosis	0	0	0	0	1	0	0	1	1	1	0	0	0
							Primary tumor at diagnosis	0	0	0	0	1	0	0	0	1	1	0	0	1
78	13.5	5.4	1	5.4	1	M	DTCs during therapy	0	0	0	1	0	0	0	0	0	0	1	1	0
79	134.1	91.8	1	27.2	1	F	Primary tumor after chemo	0	1	0	0	0	1	1	1	1	1	1	0	0
							DTCs at relapse	0	1	1	0	0	1	1	1	1	1	1	0	0
80	24.9	36.6	1	18.2	1	F	DTCs at relapse	1	0	0	1	0	0	0	0	0	0	1	0	0
81	25.6	N/A	N/A	N/A	N/A	M	DTCs at diagnosis	0	0	0	1	0	0	0	1	0	0	0	0	0
82	42.6	55	1	18.2	1	M	DTCs at relapse	0	0	1	0	1	0	0	1	1	1	1	1	1
83	54.9	115	1	26.7	1	M	DTCs at 1st relapse	0	1	0	0	0	1	1	1	1	1	1	0	0
							DTCs at 2nd relapse	0	1	0	0	0	1	1	1	1	1	1	0	0
84	48.9	16.3	1	16.3	1	F	DTCs at diagnosis	1	0	0	0	0	0	0	0	1	1	0	0	0
85	28.4	23.3	1	17.2	1	F	DTCs during therapy	1	0	0	1	0	0	0	0	0	0	0	0	0
86	25.9	14.2	1	8.7	1	M	DTCs at relapse	1	0	0	1	1	0	0	0	0	0	1	0	0
87	111.5	5.9	1	5.9	1	M	DTCs at diagnosis	1	0	1	0	0	0	0	1	0	1	0	1	1
88	59.4	26.4	0	26.4	0	M	DTCs at diagnosis	0	0	0	0	0	0	0	0	0	1	1	0	0
89	74.3	25.2	0	25.2	0	F	DTCs at diagnosis	0	0	0	0	1	0	0	0	1	1	1	0	1
90	39.4	43.1	1	27.6	1	M	DTCs at relapse	1	0	0	0	1	1	0	0	0	1	1	1	0
91	46.1	20.7	0	20.7	0	M	DTCs at diagnosis	0	0	0	0	0	1	0	0	0	1	1	0	0
92	43	22	0	22	0	M	DTCs at diagnosis	1	0	0	1	0	0	0	0	0	0	0	0	0
93	31.1	22.8	0	22.8	0	M	DTCs at diagnosis	1	0	0	0	1	0	1	0	1	0	1	0	0
94	39.5	9.6	1	9.6	1	M	DTCs at diagnosis	0	1	1	0	1	0	0	0	0	1	1	1	1
95	29.8	66.8	0	52.8	1	F	DTCs at relapse	1	0	0	Het or gain	0	1	0	0	0	1	1	1	1
96	38.8	15.1	1	15.1	1	M	DTCs at diagnosis	0	1	0	0	0	1	1	1	0	1	1	1	0
97	83.7	10.1	0	10.1	1	M	DTCs at diagnosis	0	0	0	0	0	0	0	0	0	0	0	0	0
98	54.3	14.6	0	14.6	0	M	DTCs at diagnosis	1	1	1	0	1	1	0	0	1	1	1	0	0
99	34.6	8.9	0	8.9	0	M	DTCs at diagnosis	0	0	0	0	1	1	0	0	0	1	1	0	0
100	47.2	13.7	0	13.7	0	M	DTCs at diagnosis	0	1	1	0	0	0	0	0	1	1	1	1	0
							Primary tumor at diagnosis	0	1	1	0	0	0	0	0	1	1	1	1	0
101	59.9	13.6	0	13.6	0	M	DTCs at diagnosis	1	1	0	0	1	1	0	0	0	0	1	0	0
							Primary tumor after chemo	1	1	0	0	1	1	0	0	0	0	1	1	0
102	75.2	39.1	0	18.8	1	F	DTCs at relapse	0	0	1	0	1	1	0	0	1	1	1	1	0
103	19.6	10.6	0	10.6	0	M	DTCs at diagnosis	1	0	0	1	0	1	0	0	0	0	0	0	0
104	20.1	8.7	0	8.7	0	M	DTCs at diagnosis	1	0	0	0	1	0	0	0	0	1	1	0	0
105	43.8	2.8	0	2.8	0	M	DTCs at diagnosis	1	0	0	1	0	0	0	0	0	0	1	0	0
106	36.7	14.8	0	14.8	0	F	DTCs at diagnosis	0	0	0	0	1	0	0	0	0	1	1	0	0
107	20.4	4.2	0	4.2	0	F	DTCs at diagnosis	0	1	0	0	0	0	0	0	0	1	1	0	0
108	46.1	8.4	0	8.4	0	F	DTCs at diagnosis	0	0	0	0	0	0	0	1	0	1	1	0	0
109	N/A	N/A	N/A	N/A	N/A	F	DTCs (unknown time)	1	0	0	1	0	1	0	0	0	1	1	0	0
110	198.9	N/A	N/A	N/A	N/A	F	DTCs at diagnosis	0	0	0	0	0	0	0	0	0	1	1	1	0
111	26.5	10	0	10	0	M	DTCs at diagnosis	1	0	0	1	0	0	0	0	0	0	0	0	0
112	24.9	4.7	0	4.7	0	M	DTCs at diagnosis	1	0	0	1	0	0	0	0	0	0	1	0	0
113	25.8333	12.4	1	4.83333	1	F	Primary tumor at diagnosis	0	0	0	1	0	0	0	0	0	0	0	0	0
114	39.2	4.16667	1	4.16667	1	F	Primary tumor at diagnosis	0	0	0	0	1	1	0	0	0	1	1	0	0
115	86.7667	29.6667	1	29.6667	1	F	Primary tumor at diagnosis	0	0	0	0	0	1	0	0	0	0	0	0	0
116	43.4333	41.1667	1	27.5333	1	M	Primary tumor at diagnosis	0	0	0	0	1	1	1	0	0	1	1	0	0
117	46.3	1.16667	1	1.16667	1	M	Primary tumor at diagnosis	0	0	0	0	0	1	0	0	1	1	1	0	0
118	71.9333	5.76667	1	5.76667	1	M	Primary tumor at diagnosis	0	0	0	0	0	1	1	0	0	1	1	0	1
119	13.7333	4.83333	1	4.83333	1	M	Primary tumor at diagnosis	1	0	0	1	0	0	0	0	0	0	0	1	0
120	41.3667	25.2667	1	12.7667	1	F	Primary tumor at diagnosis	0	0	0	0	0	1	0	0	1	1	1	0	0
121	26.3667	14.0333	1	12.1	1	M	Primary tumor at diagnosis	1	0	0	1	0	1	0	0	0	0	1	0	0
122	3.86667	0.633333	1	0.633333	1	F	Primary tumor at diagnosis	0	0	0	0	0	0	0	0	0	1	1	0	0
123	39.7667	22.7667	1	21.3	1	M	Primary tumor at diagnosis	0	0	0	0	0	0	0	0	0	1	1	0	0
124	115.9	15.6667	1	15.6667	1	M	Primary tumor at diagnosis	0	0	1	0	0	0	1	1	0	1	1	1	0
125	66.3667	53.6333	1	16.4	1	F	Primary tumor at diagnosis	0	0	1	0	0	0	0	0	0	1	1	1	1
126	242.667	74.1667	1	22.6333	1	F	Primary tumor at diagnosis	0	0	0	0	0	0	0	0	0	1	0	0	1
127	8.06667	178.2	0	178.2	0	F	Primary tumor at diagnosis	1	0	0	1	0	0	0	0	0	0	1	0	0
128	17.2333	93.8	0	93.8	0	M	Primary tumor at diagnosis	1	0	0	1	0	0	0	1	0	0	1	0	0
129	32.5667	76.6333	0	76.6333	0	M	Primary tumor at diagnosis	0	1	1	0	0	0	1	0	1	1	1	0	1
130	18.3667	99.0667	0	99.0667	0	F	Primary tumor at diagnosis	0	0	0	0	0	0	0	0	0	0	0	0	0
131	41.1667	58.8	0	58.8	0	F	Primary tumor at diagnosis	0	0	0	0	0	0	0	1	1	1	1	0	0
132	35.3333	129.2	0	129.2	0	M	Primary tumor at diagnosis	0	0	0	0	0	0	1	1	1	1	1	0	0
133	31.6	119.2	0	119.2	0	F	Primary tumor at diagnosis	0	0	0	0	0	1	0	0	0	1	1	0	0
134	44.5333	124.5	0	124.5	0	F	Primary tumor after chemo	1	0	0	0	0	1	0	0	1	0	1	0	0
135	19.8667	122.6	0	122.6	0	M	Primary tumor at diagnosis	1	0	0	1	0	0	0	0	0	0	1	1	0
136	55.6667	45.7	0	32.6	1	F	Primary tumor at diagnosis	0	0	0	0	0	0	0	0	0	1	0	0	0
137	12	65.4	0	65.4	0	M	Primary tumor at diagnosis	1	0	0	1	0	0	0	0	0	0	1	0	0
138	47.1	36.8	1	12	1	M	Primary tumor after chemo	0	1	1	Het	1	1	1	0	1	1	1	1	1
139	62.6667	115	0	115	0	M	Primary tumor after chemo	0	0	0	0	1	1	1	0	1	1	1	0	0
140	19.1667	62.6	0	62.6	0	F	Primary tumor at diagnosis	1	0	0	1	0	0	0	0	0	0	0	0	0
141	29.5667	179.1	0	179.1	0	F	Primary tumor after chemo	0	1	0	0	0	1	1	0	1	1	1	1	0
142	18	110.667	0	110.667	0	F	Primary tumor at diagnosis	1	0	0	1	0	0	0	0	0	1	1	0	0
143	129.333	135.7	0	135.7	0	F	Primary tumor after chemo	1	0	0	0	0	0	0	0	0	1	1	0	0
144	15.4333	123.5	0	123.5	0	F	Primary tumor at diagnosis	0	0	0	0	0	0	0	0	0	1	1	0	0
145	21.2667	63.5667	0	63.5667	0	M	Primary tumor at diagnosis	1	0	0	1	0	0	0	0	0	0	1	0	0
146	31.3	104.7	0	104.7	0	F	Primary tumor at diagnosis	0	0	0	0	0	0	0	0	0	0	0	0	0
147	10.5	171.2	0	171.2	0	F	Primary tumor after chemo	0	0	0	0	0	0	0	0	0	1	1	0	0
148	23.3	11.2	0	11.2	0	M	Primary tumor at diagnosis	0	0	0	0	0	1	1	0	0	1	1	0	1
149	215.6	225.6	0	225.6	0	F	Primary tumor after chemo	0	0	1	0	0	0	0	0	0	1	1	0	1
150	48.6	7	0	7	0	F	Primary tumor at diagnosis	0	0	0	0	0	1	0	0	0	1	1	1	0
151	38.2	8.2	0	8.2	1	M	Primary tumor at diagnosis	0	0	0	0	0	0	0	0	0	0	0	0	0
152	174.1	40	1	27.9	1	M	Primary tumor at diagnosis	0	0	0	Het	1	1	1	0	0	0	1	0	0
153	6.4	8.3	0	8.3	0	M	Primary tumor at diagnosis	0	0	0	0	0	0	0	0	0	0	0	0	0
154	12.3	28.9	0	28.9	0	F	Primary tumor at diagnosis	0	1	1	0	1	0	1	0	0	0	1	0	0
