# Supplementary material for: Impact of Disseminated Neuroblastoma Cells on the Identification of the Relapse-Seeding Clone
Source: Oxford University Press journal article supplement (doi:10.1158/1078-0432.ccr-16-2082), 2017-02-22
Supplement: 10780432ccr162082-sup-170399_3_supp_3859412_tl26cb.xlsx [file 10780432ccr162082-sup-170399_3_supp_3859412_tl26cb.xlsx]

## Sheet: Sheet1
Supplementary Table S6. Genes in the SROs of 1q and 19 deletions
Aberration	SRO	genes
1q deletion	241,485kb-ter	RGS7, FH, KMO, OPN3, CHML, WDR64, EXO1, MAP1LC3C, PLD5, LOC731275, CEP170, SDCCAG8, MIR4677, AKT3, LOC339529, ZBTB18, C1orf100, ADSS, C1orf101, DESI2, COX20, HNRNPU-AS1, HNRNPU, EFCAB2, KIF26B, SMYD3, LOC255654, TFB2M, CNST, SCCPDH, LOC149134, AHCTF1, ZNF695, ZNF670-ZNF695, ZNF670, ZNF669, C1orf229, ZNF124, MIR3916, VN1R5, ZNF496, NLRP3, OR2B11, OR2W5, GCSAML-AS1, OR2C3, GCSAML, OR2G2, OR2G3, OR1…
19q deletion	57,633kb-ter	USP29, ZIM3, DUXA, ZNF264, AURKC, ZNF805, ZNF460, ZNF543, ZNF304, TRAPPC2P1, ZNF547, ZNF548, ZNF17, ZNF749, VN1R1, ZNF772, ZNF419, ZNF773, ZNF549, ZNF550, ZNF416, ZIK1, ZNF530, ZNF134, ZNF211, ZSCAN4, ZNF551, ZNF154, ZNF671, ZNF776, ZNF586, ZNF552, FKBP1AP1, ZNF587B, ZNF587, ZNF814, ZNF417, ZNF418, ZNF256, C19orf18, ZNF606, LOC100128398, ZSCAN1, ZNF135, ZSCAN18, ZNF329, ZNF274, ZNF544, ZNF8, ZSCA…
