# Supplementary material for: Impact of Disseminated Neuroblastoma Cells on the Identification of the Relapse-Seeding Clone
Source: Oxford University Press journal article supplement (doi:10.1158/1078-0432.ccr-16-2082), 2017-02-22
Supplement: 10780432ccr162082-sup-170399_3_supp_3859414_gl28nw.xlsx [file 10780432ccr162082-sup-170399_3_supp_3859414_gl28nw.xlsx]

## Sheet: Sheet1
Supplementary Table S7. Effect of low expression of some genes located at 1q or 19q on survival of neuroblastoma patients
	according to different datasets in R2 database
					bonf p value
Dataset	Survival	RGS7	AKT3	C1orf101	COX20	CNST	FMN2	ZNF264	AURKC	Source	Reference
Tumor Neuroblastoma - Kocak -	EFS	1.2e-07	0.421	0.00013	4.7e-13	8.5e-25	0.344	0.00014	1	GEO ID:	Reference:
649 - custom - ag44kcwolf	OS	5.6e-10	0.077	0.0024	1.8e-19	6.9e-29	0.21	0.0048	1	GSE45547	36
Tumor Neuroblastoma-Oberthuer -	EFS	2.9e-05	N/A	N/A	N/A	0.0002	5.6e-07	N/A	N/A	ArrayExpress	Reference:
251 - custom - amexp255	OS	1.1e-07	N/A	N/A	N/A	4.8e-07	1.7e-08	N/A	N/A	ID:E-TABM-38	35
Tumor Neuroblastoma - SEQC -	EFS	1.2e-08	0.0062	9.1e-11	3e-07	1.6e-17	8.1e-13	0.002	0.022	GEO ID:	Reference:
498 - RPM - seqcnb1	OS	6e-12	0.31	2.7e-07	1.2e-10	2.8e-22	4.7e-12	3.5e-06	2.8e-08	GSE62564	37
Tumor Neuroblastoma TARGET - Asgharzadeh - 249 - custom - huex10t	OS	0.465	1	0.916	0.0019	0.899	0.108	1	1	TARGET website data matrix	N/A
Tumor Neuroblastoma non MYCN amplified - Seeger - 102 - MAS5.0 - u133a	relapse free	0.231	0.679	N/A	1	N/A	N/A	1	1	GEO ID: GSE3446	Reference: 34
Tumor Neuroblastoma public -	relapse free	0.0075	0.071	0.151	0.019	0.0008	0.0018	2.7e-06	0.085	GEO ID:	Reference:
Versteeg -88 - MAS5.0 - u133p2	OS	2.2e-05	0.016	0.026	0.00021	0.00014	0.0091	2.3e-06	0.0046	GSE16476	9
