# Supplementary material for: Impact of Disseminated Neuroblastoma Cells on the Identification of the Relapse-Seeding Clone
Source: Oxford University Press journal article supplement (doi:10.1158/1078-0432.ccr-16-2082), 2017-02-22
Supplement: 10780432ccr162082-sup-170399_3_supp_3859418_5l26cb.xlsx [file 10780432ccr162082-sup-170399_3_supp_3859418_5l26cb.xlsx]

## Sheet: Supplementary Table S3
Supplementary Table S3. Chromosomal aberrations and corresponding breakpoints and their
	subclonal frequencies in various samples of the single neuroblastoma patient
Groups	Samples	Chromosomal aberrations and breakpoints*
A	All samples	3p- (29,452-29,534); 5p- (37,010-37,289); 5q cnLOH (74,242-ter); +6p (ter-44,286); +7q (77,956-ter)**; 11q- (70,241-ter); 12q- (45,844-46,231); 13q- (20,397-20,455); 16q- (83,135-ter); +17q (30,218-ter); +17q (45,753-ter); 19q- (48,462-ter); Xq- (76,939; 76,982)
B	Tumor at diagnosis (65%)	3p- (ter-48,701); 7q- (146,988-147,189)
C	Tumor at diagnosis (58%)	7q- (71,461-ter)
D	Tumor at diagnosis (55%)	+12q (110,904-ter); +12q (115.152-ter)
E	Tumor at diagnosis (44%)	Chr. 8 hyper rearrangment: 4,214; 4,681; 8,222; 58,266; 64,279; 85,075; 85,725; 86,431; 97,037; 108,505; 109,161; 112,061; 112,201; 112,814
F	Tumor at diagnosis (18%)	+7q (77,956-ter)**
G	Tumor at diagnosis (13%)	13q- (66,888-67,514)
H	DTCs at diagnosis, DTCs at relapse, and Tumor at relapse (100%); Tumor at diagnosis (35%)	Loss of chromosome Y
J	DTCs at diagnosis, DTCs at relapse, and Tumor at relapse (100%); Tumor at diagnosis (34%)	+1p (49,772-49,927)
K	Tumor at diagnosis (18%)	+2q (178,967-179,078); 8p- (ter-10,082)
L	Tumor at diagnosis (12%)	8p- (13,043-13,243); 17p- (ter-11,914)
M	Tumor at diagnosis (6%)	3p- (4,536-4,690)
N	Tumor at diagnosis (3%)	3p- (ter-54,907)
O	DTCs at diagnosis (70%); Tumor at diagnosis (14%)	8p- (ter-9,525)
P	Tumor at diagnosis (6%)	7p- (8,552-8,648); 7q- (68,235-92,215); 9q- (84,509-125,949)
Q	Tumor at diagnosis (4%)	Trisomy of chromosome 18
R	DTCs at diagnosis (70%); Tumor at diagnosis (6%)	3p- (ter-53,556)
S	DTCs at diagnosis (30%); Tumor at diagnosis (4%)	12q- (58,803-69,236)
T	DTCs at diagnosis (30%); Tumor at diagnosis (3%)	19q- (44,004-48,462)
U	DTCs at diagnosis (30%)	2q- (154,468-155,197); +12q (100,697-ter)
V	DTCs at diagnosis (40%)	2q- (149,050-166,819)
W	DTCs at relapse and Tumor at relapse (100%); DTCs at diagnosis (30%)	1q- (231,262-ter)
X	DTCs at relapse and Tumor at relapse (100%)	+1q (143,932-231,262); 2q- (154,881-155,063); +2q (177,345-177,536); +2q (206,279-206,661); 3p- (29,007-29,728); 6p cnLOH (ter-44,286); +7q (122,035-122,096); 9p- (ter-1,960); 9p- (8,812-9,061); +10pq (ter-81,454); +10q (69,524-69,681); 10q- (90,150-ter); +12q (100,280-ter)
Y	DTCs at relapse and Tumor at relapse (60%)	Duplication of chromosome 17
Z	Tumor at relapse (50%)	5p- (ter-12,709)
		* Breakpoints are given in kb.
		** Additional copies of this region (F) were acquired only in the tumor.
